# Supplementary material for: Experimental evidence for hydrogen incorporation into Earth’s core
Source: PubMed Central journal article supplement (PMC8113257; doi:10.1038/s41467-021-22035-0), 2021-05-11
Supplement: 41467_2021_22035_MOESM1_ESM.pdf [file 41467_2021_22035_MOESM1_ESM.pdf]

Supplementary Information for

**Experimental evidence for hydrogen incorporation into  
Earth's core**

by Tagawa *et al.*

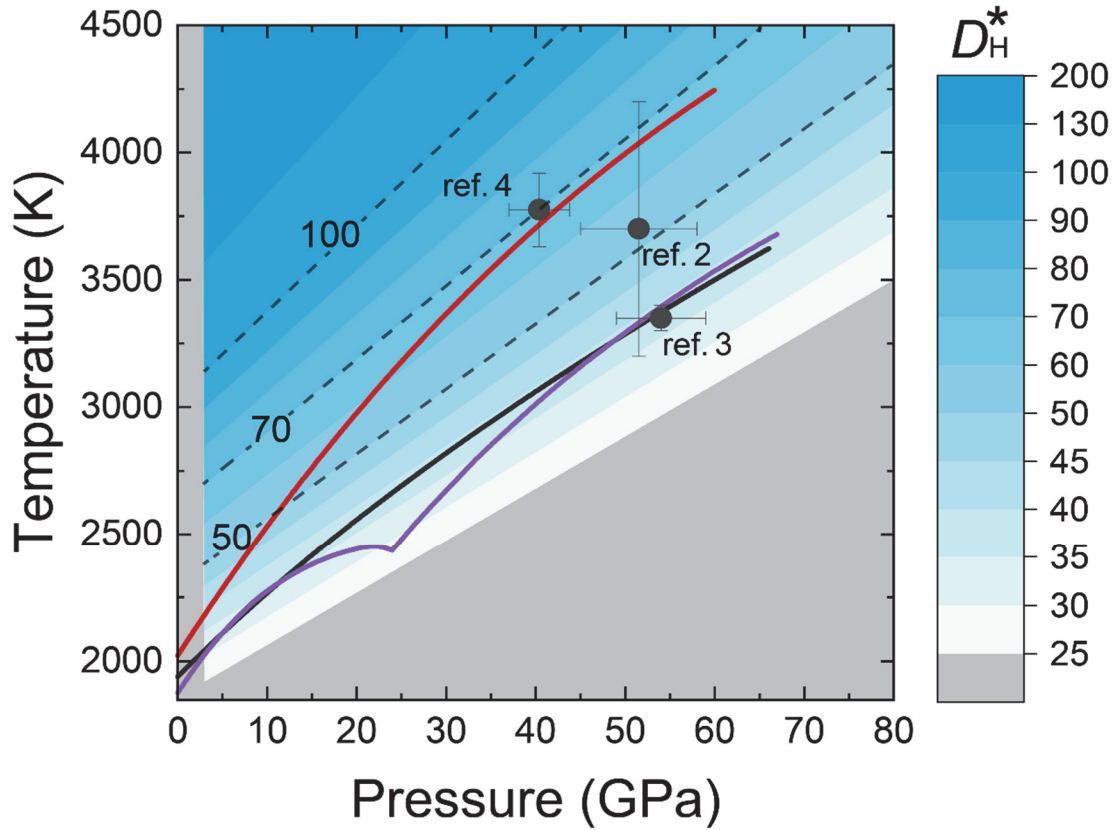

**Supplementary Fig. 1  $P$ - $T$  conditions for core formation and the metal/silicate partition coefficient of hydrogen  $D_{\text{H}}^*$ .** The  $P$ - $T$  conditions for metal-silicate equilibrium based on single-stage core formation models<sup>2-4</sup> are shown by black circles. The  $P$ - $T$  evolutions in the present continuous and multi-stage core formation models are from earlier modellings;  $T_{\text{MOB1}}$  (red) adopted in ref. 5,  $T_{\text{MOB2}}$  (black) in ref. 3 and  $T_{\text{MOB3}}$  (purple) in refs. 6 & 60.  $D_{\text{H}}^*$  is defined for simplicity as  $c_{\text{H}}^{\text{core}}/c_{\text{H}}^{\text{silicate}}$ , in which  $c_{\text{H}}^{\text{core}}$  represents hydrogen concentration in iron by weight, without considering other elements so that  $D_{\text{H}}^*$  does not depend on the incorporation of O and Si whose amounts change with  $P$  and  $T$ .  $D_{\text{H}}^*$  at  $\Delta\text{IW} = -2.3$  is greater than 29 along  $P$ - $T$  paths considered in any previous core formation models except below  $\sim 3$  GPa where hydrogen is not partitioned into iron<sup>10,16</sup>.

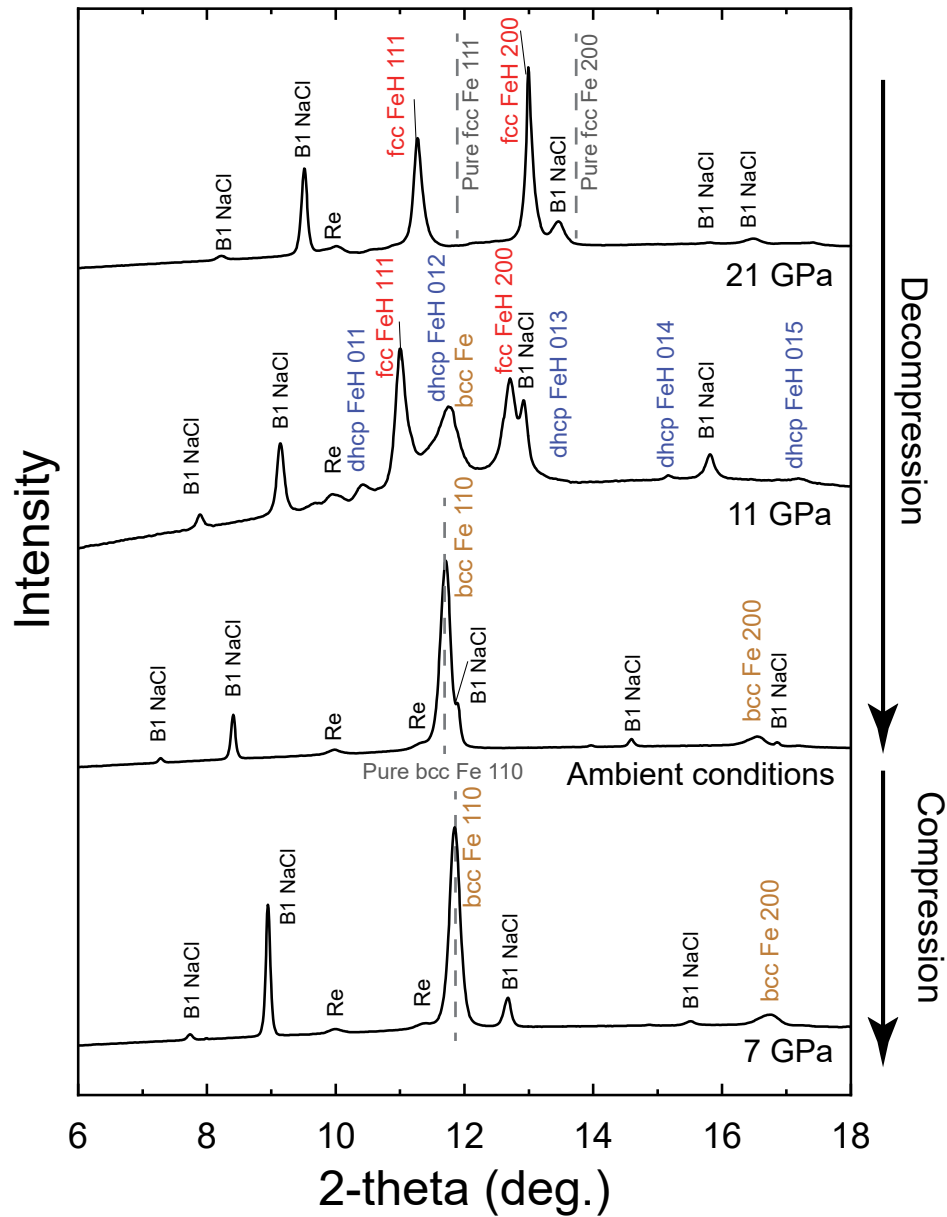

**Supplementary Fig. 2 Changes in XRD patterns upon decompression from 21 GPa to ambient pressure and subsequent re-compression to 7 GPa.** The FeH<sub>X</sub> (X=1.0) sample was sandwiched between the NaCl layers (pressure medium) in a DAC. The lattice volume of the sample was larger than that of pure Fe at 21 GPa but became identical to it after decompression to 1 bar, indicating loss of hydrogen from iron lattice. Upon subsequent re-compression, dhcp FeH was not formed, suggesting that hydrogen did not remain within metal but escaped from the sample.

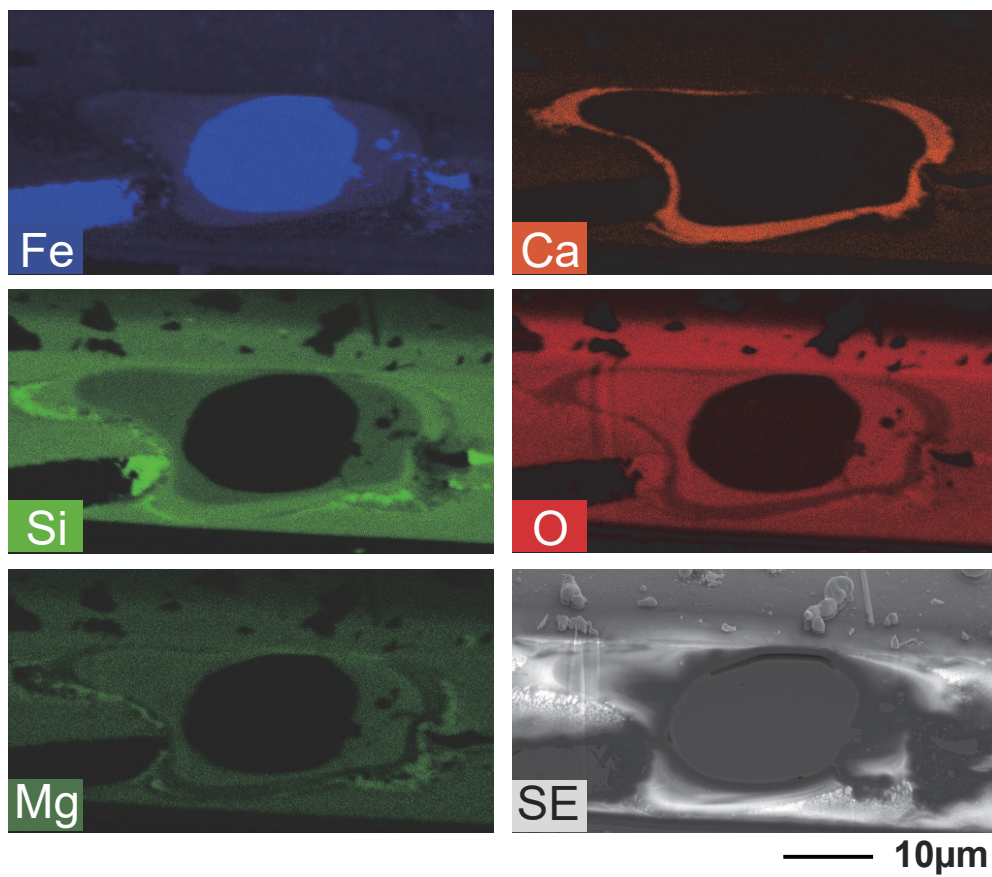

**Supplementary Fig. 3 Sample cross-section for run #1.** X-ray maps for Fe, Ca, Si, O and Mg and scanning electron microscope image.

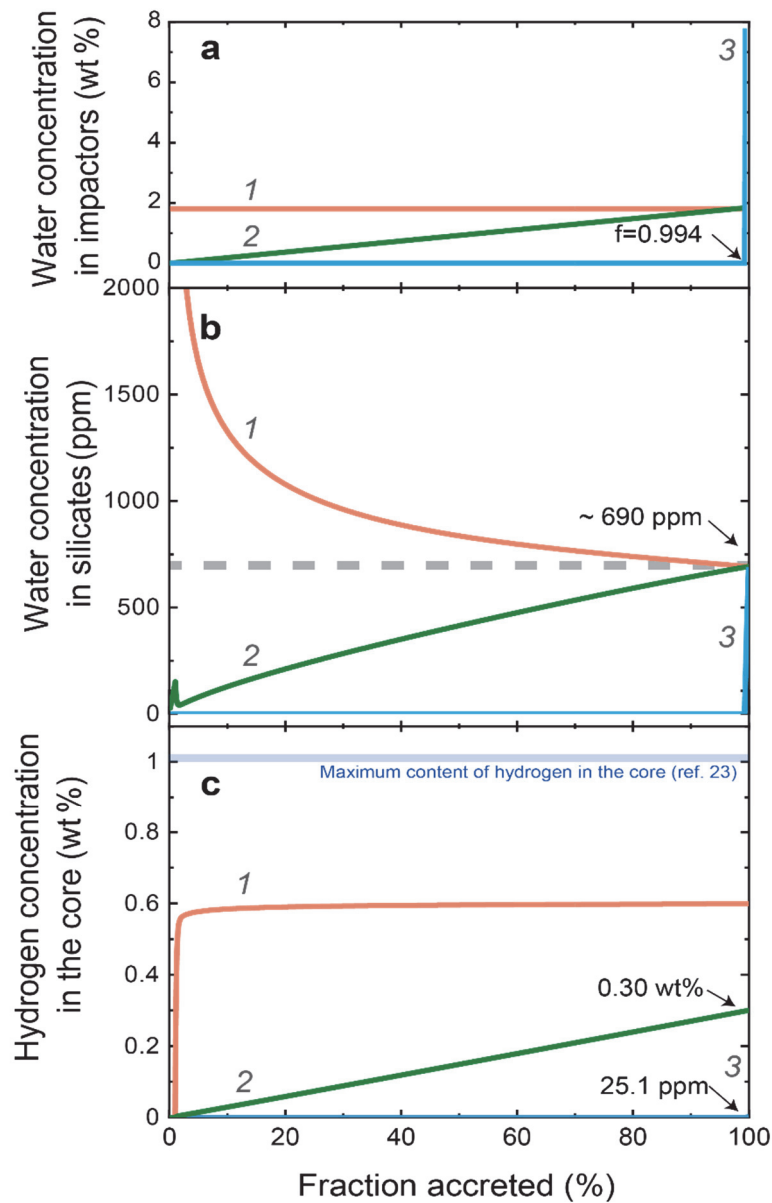

**Supplementary Fig. 4 Delivery of water and evolution of H<sub>2</sub>O in silicates and H in the core based on continuous core formation model.** Evolutions in water concentration in impactors (a) and equilibrated silicates (b) and in hydrogen content in the core (c). Calculations were performed along path 6 in Badro *et al.*<sup>5</sup> with three different water delivery scenarios illustrated in a; constant (orange), linear increase (green) and none except the last seven impactors (blue).

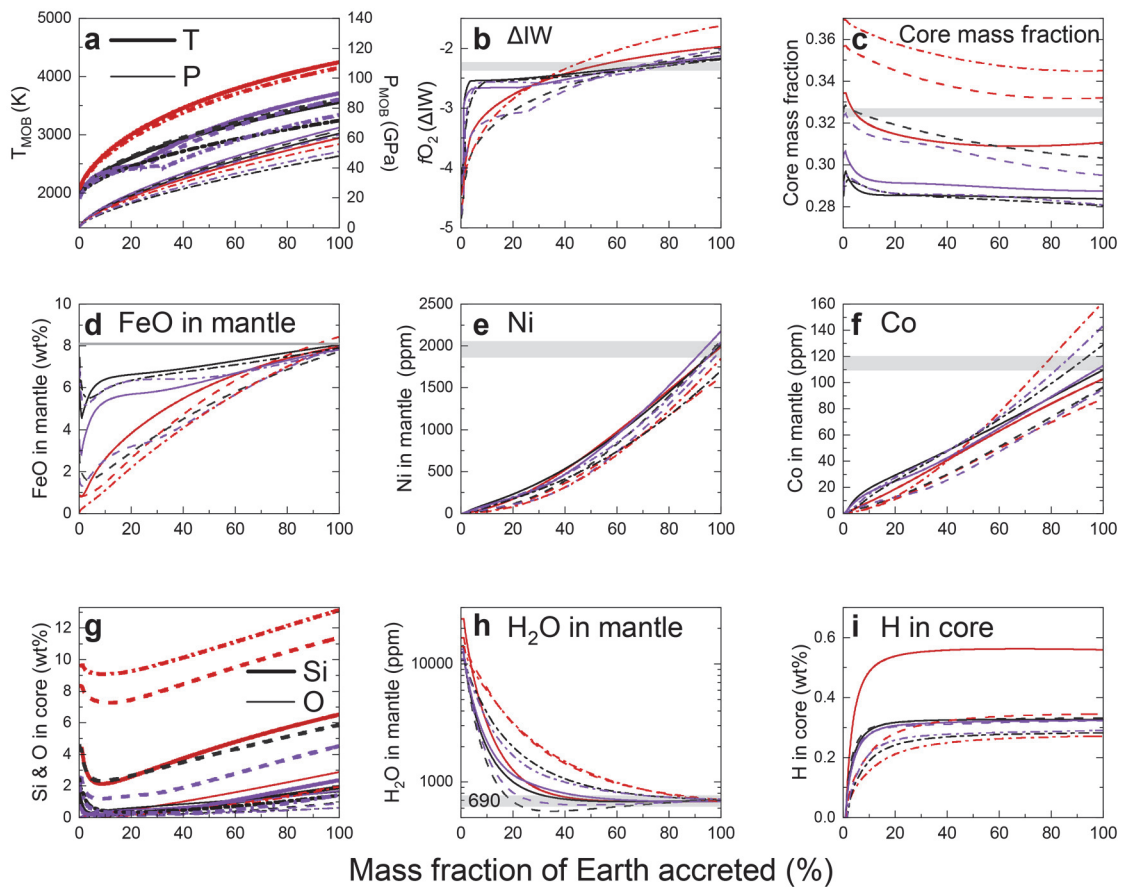

**Supplementary Fig. 5 Evolution during multi-stage core formation.** (a, b)  $P$  &  $T$  (a) and  $f\text{O}_2$  (b) conditions for metal-silicate equilibrium; (c) core mass fraction; (d–i) FeO (d), Ni (e), Co (f) and  $\text{H}_2\text{O}$  (h) in the silicate, and O & Si (g) and H (i) in the core. Calculations were made for nine different combinations of partitioning data (solid curves<sup>2,57</sup>, S1–S3; dotted curves<sup>3</sup>, F1–F3; dash-dotted curve<sup>6</sup>, R1–R3) and  $P$ - $T$  path (red,  $T_{\text{MOB1}}$ ; black,  $T_{\text{MOB2}}$ ; purple,  $T_{\text{MOB3}}$ ) (Supplementary Table 4). See Supplementary Table 3 for each parameter set.

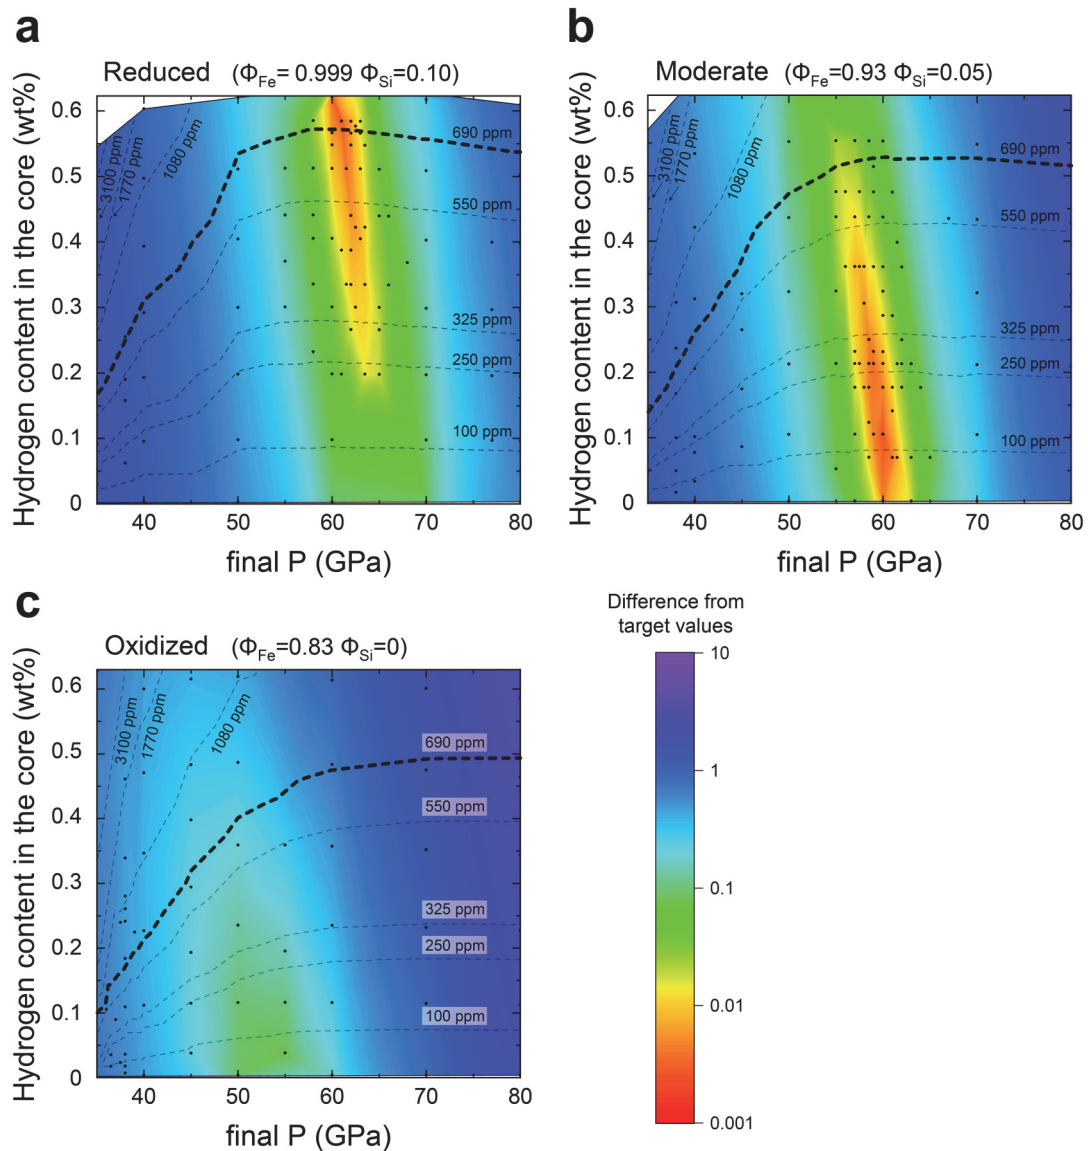

**Supplementary Fig. 6 Parameter search maps for reductive, moderate and oxidative impactors.** The impactor's  $\Phi_{\text{Fe}}$  and  $\Phi_{\text{Si}}$  values in **a** and **c** are from homogeneous accretion models by Rubie *et al.*<sup>60</sup> (those in **b** are in between). Note that they are different from those of best model parameters sets listed in [Supplementary Table 3](#). Colors indicate the difference from target values, which is defined as  $\Sigma((\text{calculated value})/(\text{present Earth value})-1)^2$  for core mass fraction and mantle concentrations of FeO, Ni and Co. Dots indicate calculation points. Bold broken lines show the target of leaving  $\sim 690$  ppm H<sub>2</sub>O in silicates after core formation.

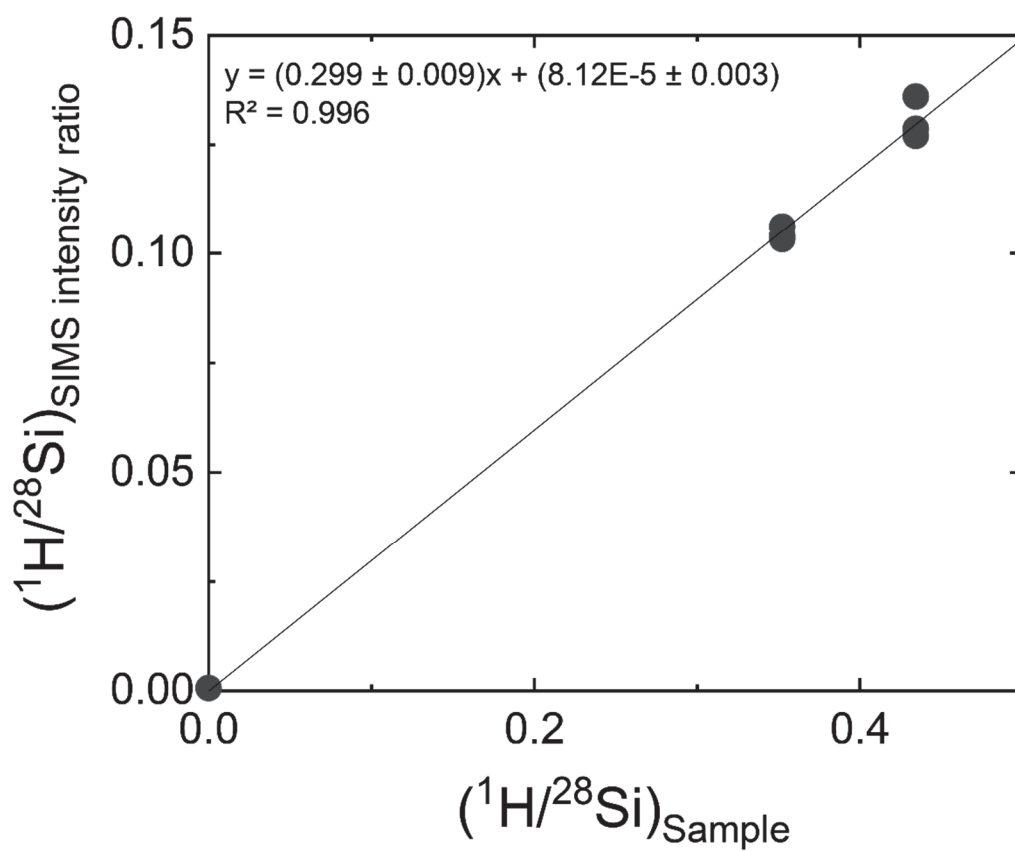

**Supplementary Fig. 7 Calibration curve for the SIMS analysis of  $^1\text{H}/^{28}\text{Si}$  based on standard glasses.**



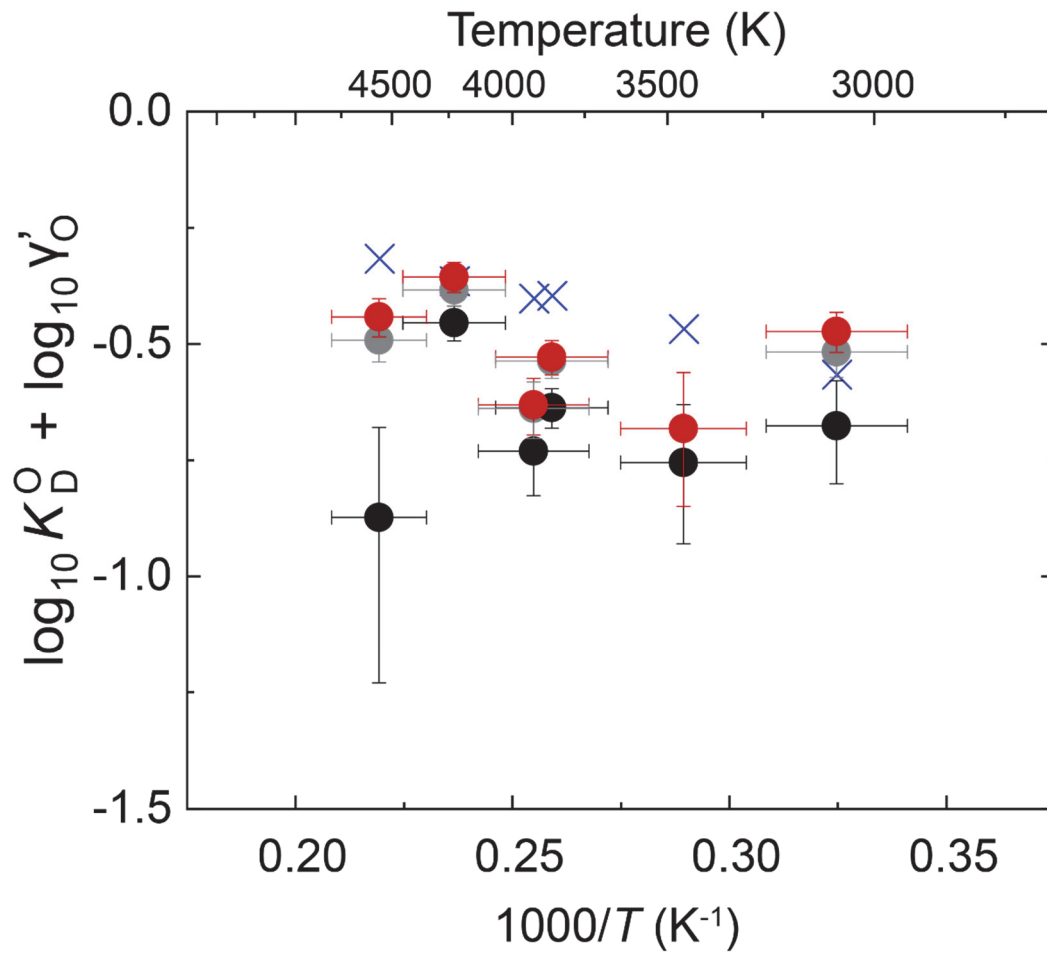

**Supplementary Fig. 8**  $K_D^O$  with and without considering the presence of hydrogen and carbon for activity estimates. Black and grey circles are based on molar fractions obtained including hydrogen and carbon, respectively, along with silicon and oxygen in liquid iron, while red circles do not include hydrogen nor carbon to obtain the  $K_D^O$  values. Crosses show earlier results obtained in the H-free system<sup>3</sup>.

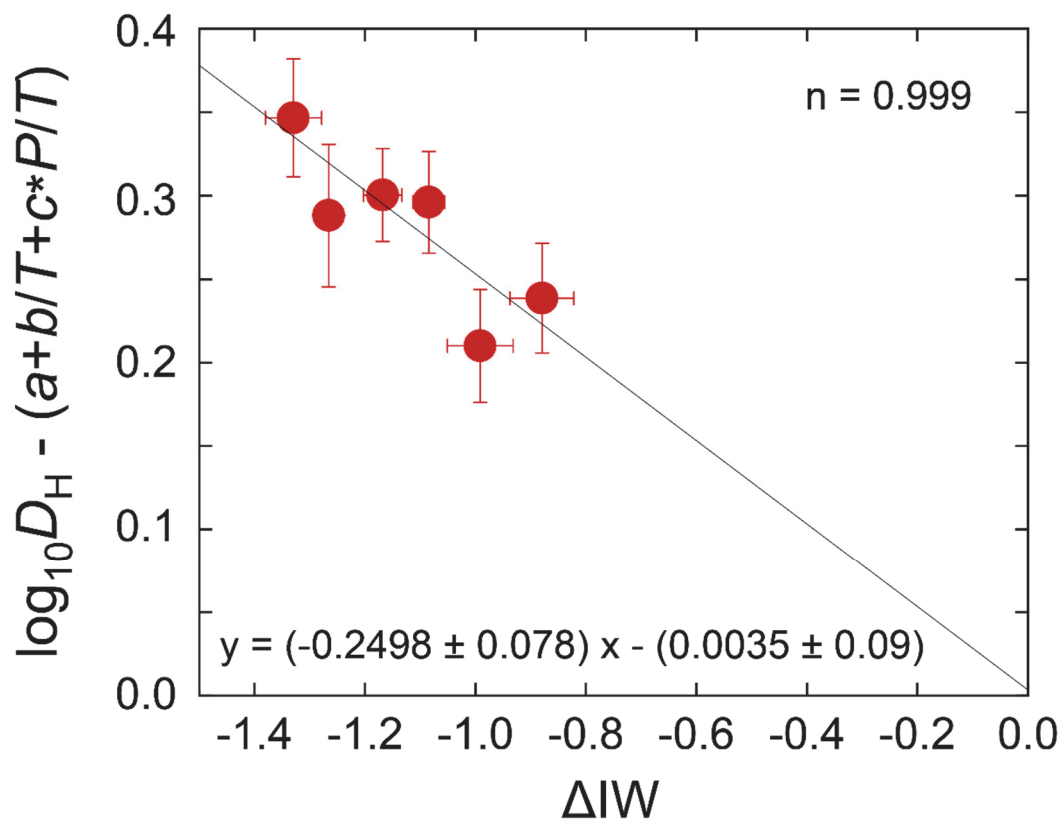

**Supplementary Fig. 9 Partition coefficient  $D$  of hydrogen (molar basis) as a function of oxygen fugacity relative to the IW buffer.** The difference in experimental  $P$  and  $T$  condition is corrected by the  $a + b/T + cP/T$  term. The slope of this plot indicates the valence state ( $n$ ) of hydrogen in silicate melt to be 0.999.

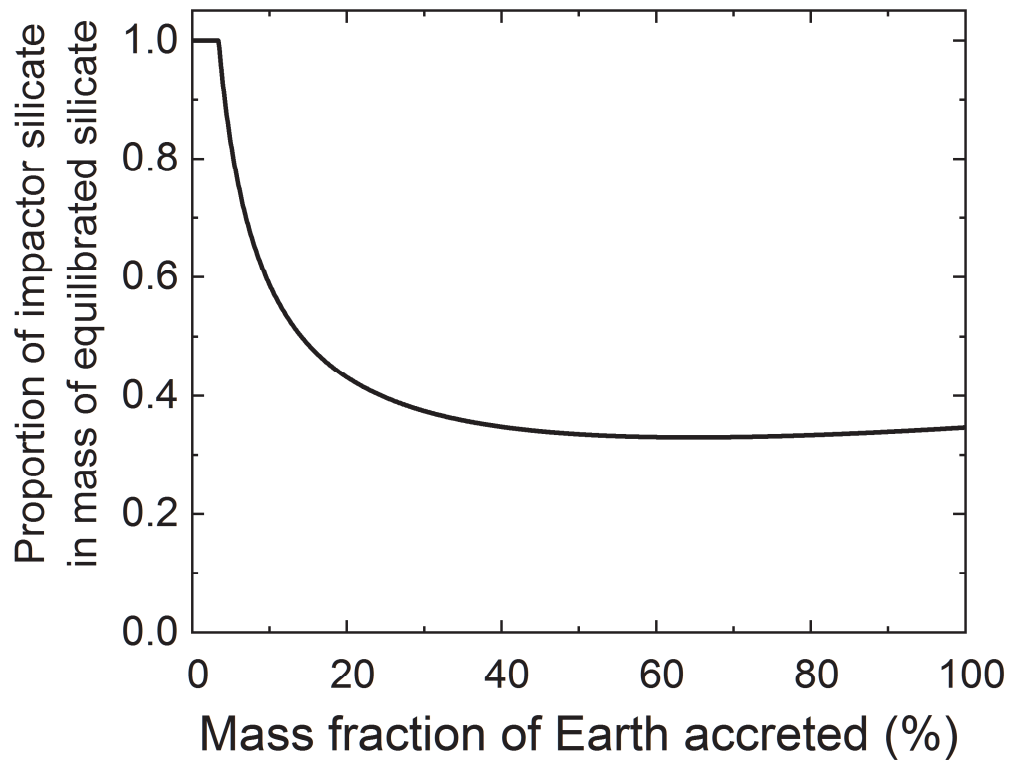

**Supplementary Fig. 10 Change in the proportion of impactor silicate in silicate with which impactor core equilibrated.** The result for model S1 in [Supplementary Tables 3 and 4](#) is shown.

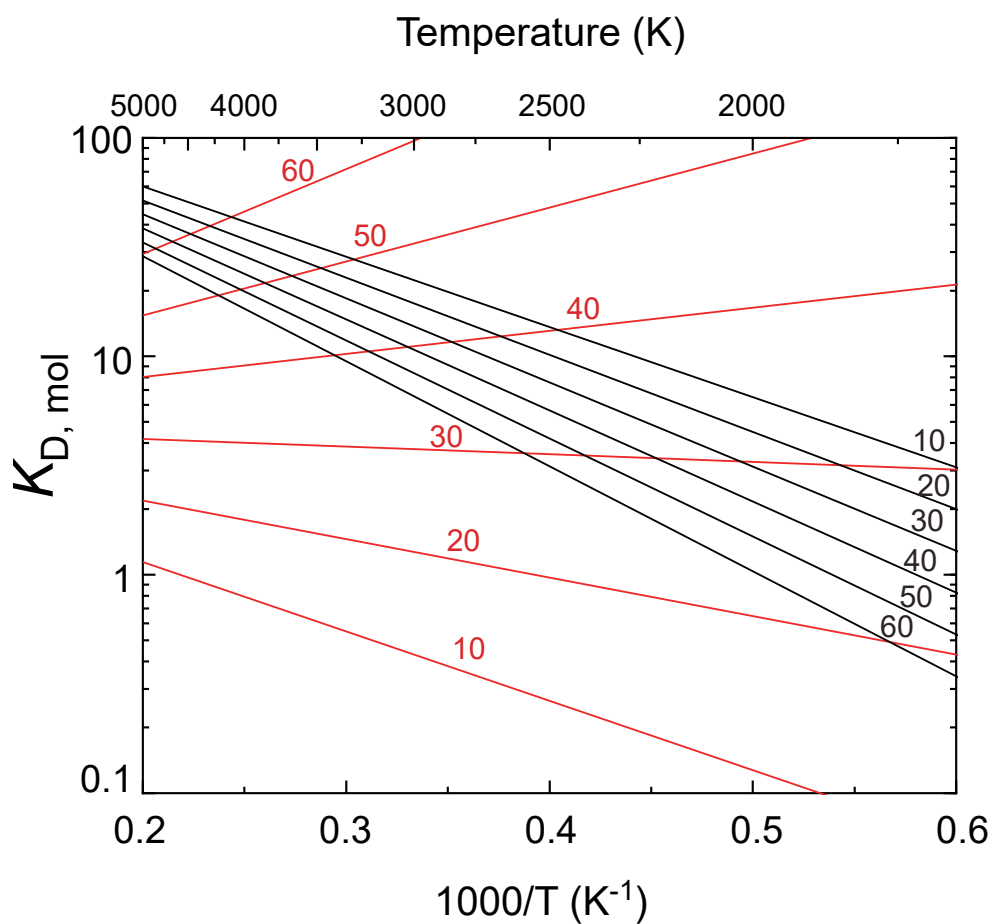

**Supplementary Fig. 11 Comparison of exchange coefficient  $K_D$  between those obtained only from the present experiments (black lines) and from earlier low-pressure experiments<sup>12</sup> combined with this study (red lines). The numbers given to each datum point and regression line indicate pressure conditions.**

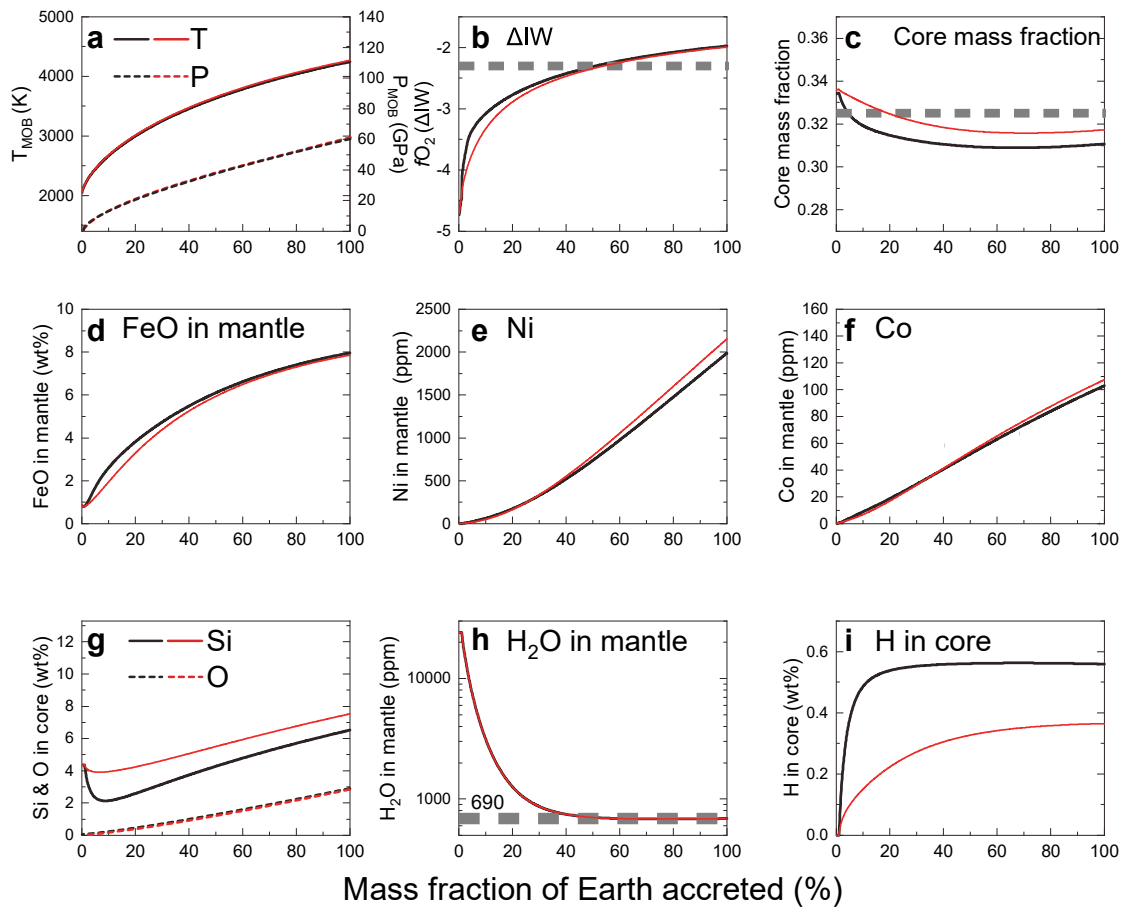

**Supplementary Fig. 12 Changes in evolution during multi-stage core formation with different  $K_D$  for hydrogen.** Similar to [Supplementary Fig. 5](#). Black (model #S1) and red curves (model #S1') show results with  $K_D$  from Eqs. 2 and 10, respectively. Other model parameters are given in [Supplementary Table 3](#).

**Supplementary Table 1 Summary of the present experiments**

| Run #                                                  | #1            | #2            | #3            | #4              | #5            | #6            |
|--------------------------------------------------------|---------------|---------------|---------------|-----------------|---------------|---------------|
| $P$ (GPa)                                              | 46(5)         | 48(5)         | 57(6)         | 60(6)           | 47(5)         | 30(3)         |
| $T$ (K)                                                | 3920<br>(200) | 3450<br>(170) | 3860<br>(190) | 4560<br>(230)   | 4230<br>(210) | 3080<br>(150) |
| H in metal<br>(ppm wt)                                 | 9390<br>(690) | 9030<br>(690) | 9280<br>(630) | 26160<br>(1600) | 5320<br>(380) | 8020<br>(640) |
| H in silicate<br>(ppm wt)                              | 201(3)        | 309(5)        | 233(5)        | 466(9)          | 94(6)         | 219(4)        |
| $D_H$                                                  | 47(4)         | 29(2)         | 40(3)         | 56(4)           | 57(6)         | 37(3)         |
| $fO_2$ ( $\Delta IW$ )                                 | -0.88         | -0.99         | -1.08         | -1.17           | -1.27         | -1.33         |
| Structure of $FeH_X$                                   | fcc           | fcc           | fcc           | hcp             | fcc           | fcc           |
| Lattice volume of<br>$FeH_X$ ( $\text{\AA}^3$ )        | 42.84(1)      | 43.26(11)     | 41.59(4)      | 25.14(65)       | 40.84(3)      | 44.60(4)      |
| Hydrogen content<br>$X$                                | 0.52          | 0.52          | 0.52          | 1.78            | 0.23          | 0.43          |
| $\epsilon$ -FeOOH<br>proportion*                       | 0.19          | 0.15          | 0.18          | 0.06            | 0.13          | 0.07          |
| Area of ROI in<br>SIMS analysis<br>( $\mu\text{m}^2$ ) | 120           | 160           | 80            | 110             | 60            | 80            |
| $\log_{10}K_D^H$                                       | 1.32(6)       | 1.10(6)       | 1.22(5)       | 1.37(5)         | 1.35(6)       | 1.18(6)       |

Numbers in parentheses indicate uncertainty in the last digits. Errors in hydrogen concentration in metal derive mainly from the uncertainty in  $\Delta V_H$  (Eq. 3) in addition to those in the volume of  $FeH_X$  and the proportion of FeOOH.

\*Defined as  $\frac{x_{\epsilon\text{-FeOOH}}}{x_{\epsilon\text{-FeOOH}} + x_{FeH_X}}$

**Supplementary Table 2 Conditions and consequences of single-stage core formation**

|        | Conditions     |              |             | Core composition (wt%) |      |     |     | Contribution to CDD* |      |     |     |
|--------|----------------|--------------|-------------|------------------------|------|-----|-----|----------------------|------|-----|-----|
|        | <i>P</i> (GPa) | <i>T</i> (K) | $\Delta IW$ | S                      | Si   | O   | H   | S                    | Si   | O   | H   |
| ref. 2 | 50             | 3500         | -2.3        | 2.0                    | 4.5  | 2.5 | 0.4 | 14%                  | 47%  | 29% | 41% |
| ref. 3 | 54             | 3350         | -2.3        | 2.0                    | 7.9  | 1.5 | 0.3 | 14%                  | 83%  | 17% | 33% |
| ref. 4 | 40             | 3750         | -2.3        | 2.0                    | 13.3 | -   | 0.6 | 14%                  | 139% | -   | 62% |

\*The outer core density deficit (CDD) is explained by 13.9 wt% S, 9.6 wt% Si, 8.7wt% O or 1.0 wt% H according to Umemoto & Hirose<sup>24</sup>.

**Supplementary Table 3 Parameter sets for multi-stage core formation models**

| Model #                     | S1                             | S1'*              | S2                | S3                | F1                | F2                | F3-1              | F3-2              | R1                | R2                | R3                |       |
|-----------------------------|--------------------------------|-------------------|-------------------|-------------------|-------------------|-------------------|-------------------|-------------------|-------------------|-------------------|-------------------|-------|
| Partitioning data           | refs. 2, 57                    |                   |                   |                   | ref. 3            |                   |                   |                   | ref. 6            |                   |                   |       |
| $N$                         | 3                              | 3                 | 3                 | 2                 | 1                 | 3                 | 3                 | 10                | 1                 | 3                 | 3                 |       |
| final $P$ (GPa)             | 60                             | 60                | 63                | 67                | 60                | 65                | 62                | 61                | 56                | 48                | 51                |       |
| $T$                         | $T_{\text{MOB1}}$              | $T_{\text{MOB1}}$ | $T_{\text{MOB2}}$ | $T_{\text{MOB3}}$ | $T_{\text{MOB1}}$ | $T_{\text{MOB2}}$ | $T_{\text{MOB3}}$ | $T_{\text{MOB3}}$ | $T_{\text{MOB1}}$ | $T_{\text{MOB2}}$ | $T_{\text{MOB3}}$ |       |
| $\Phi_{\text{Fe}}$          | 0.985                          | 0.985             | 0.880             | 0.935             | 0.985             | 0.950             | 0.970             | 0.950             | 0.999             | 0.860             | 0.870             |       |
| $\Phi_{\text{Si}}$          | 0.085                          | 0.085             | 0.030             | 0.015             | 0.170             | 0.088             | 0.050             | 0.080             | 0.200             | 0.041             | 0.038             |       |
| H <sub>2</sub> O (wt%)      | 1.60                           | 1.00              | 0.88              | 0.88              | 1.07              | 0.95              | 0.90              | 0.92              | 0.88              | 0.76              | 0.78              |       |
| Impactor core mass fraction | 0.334                          | 0.336             | 0.289             | 0.303             | 0.357             | 0.325             | 0.323             | 0.323             | 0.370             | 0.285             | 0.288             |       |
| Impactor core radius (km)   | 276.6                          | 277.1             | 263.5             | 306.6             | 407.6             | 274.1             | 273.5             | 183.2             | 412.6             | 262.4             | 263.2             |       |
| Impactor silicate (wt%)     | FeO                            | 0.87              | 0.87              | 6.41              | 3.55              | 0.92              | 2.86              | 1.70              | 2.85              | 0.06              | 7.45              | 6.95  |
|                             | SiO <sub>2</sub>               | 50.34             | 50.81             | 49.41             | 51.29             | 48.33             | 49.74             | 51.37             | 49.98             | 47.98             | 48.68             | 49.01 |
|                             | MgO                            | 38.02             | 38.37             | 35.20             | 35.98             | 40.24             | 37.70             | 37.37             | 37.55             | 41.45             | 35.08             | 35.21 |
|                             | Al <sub>2</sub> O <sub>3</sub> | 4.63              | 4.67              | 4.29              | 4.38              | 4.90              | 4.59              | 4.55              | 4.57              | 5.05              | 4.27              | 4.29  |
|                             | CaO                            | 3.73              | 3.77              | 3.46              | 3.53              | 3.95              | 3.70              | 3.67              | 3.69              | 4.07              | 3.44              | 3.46  |
|                             | H <sub>2</sub> O               | 2.40              | 1.51              | 1.24              | 1.26              | 1.66              | 1.41              | 1.33              | 1.36              | 1.40              | 1.06              | 1.10  |
| Impactor core (wt%)         | Fe                             | 88.16             | 88.16             | 89.98             | 91.19             | 84.40             | 87.69             | 89.69             | 88.07             | 83.33             | 89.21             | 89.46 |
|                             | Ni                             | 5.23              | 5.23              | 5.98              | 5.70              | 5.01              | 5.40              | 5.41              | 5.42              | 4.88              | 6.07              | 6.01  |
|                             | Co                             | 0.25              | 0.25              | 0.28              | 0.27              | 0.24              | 0.25              | 0.25              | 0.25              | 0.23              | 0.29              | 0.28  |
|                             | O                              | 0.00              | 0.00              | 0.00              | 0.00              | 0.00              | 0.00              | 0.00              | 0.00              | 0.00              | 0.00              | 0.00  |
|                             | Si                             | 4.36              | 4.36              | 1.76              | 0.84              | 8.35              | 4.66              | 2.65              | 4.25              | 9.57              | 2.44              | 2.24  |
|                             | S                              | 2.00              | 2.00              | 2.00              | 2.00              | 2.00              | 2.00              | 2.00              | 2.00              | 2.00              | 2.00              | 2.00  |
| $K_{\text{D}}(\text{Ni})$   | a                              | 0.098             |                   |                   |                   |                   |                   | 0.46              |                   | 1.06              |                   |       |
|                             | b                              | 3605              |                   |                   |                   |                   |                   | 2700              |                   | 1553              |                   |       |
|                             | c                              | -57               |                   |                   |                   |                   |                   | -61               |                   | -98               |                   |       |
| $K_{\text{D}}(\text{Co})$   | a                              | 0.267             |                   |                   |                   |                   |                   | 0.36              |                   | 0.13              |                   |       |
|                             | b                              | 1744              |                   |                   |                   |                   |                   | 1500              |                   | 2057              |                   |       |
|                             | c                              | -37               |                   |                   |                   |                   |                   | -33               |                   | -57               |                   |       |
| $K_{\text{D}}(\text{O})$    | a                              | 0.986             |                   |                   |                   |                   |                   | 0.6               |                   | 0.6†              |                   |       |
|                             | b                              | -3275             |                   |                   |                   |                   |                   | -3800             |                   | -3800†            |                   |       |
|                             | c                              | 0                 |                   |                   |                   |                   |                   | 22                |                   | 22†               |                   |       |
| $K_{\text{D}}(\text{Si})$   | a                              | 0.549             |                   |                   |                   |                   |                   | 1.3               |                   | 2.98              |                   |       |
|                             | b                              | -12324            |                   |                   |                   |                   |                   | -13500            |                   | -15934            |                   |       |
|                             | c                              | 0                 |                   |                   |                   |                   |                   | 0                 |                   | ‡                 |                   |       |

$\text{Log}K_{\text{D}}$  is given by  $a + b/T + cP/T$ .

\*with  $K_{\text{D}}$  given in Eq. 10, while other models are based on that in Eq. 2.

†ref. 3

‡ $\text{Log}K_{\text{D}} = a + b/T + (c_1P + c_2P^2 + c_3P^3)/T$ ;  $c_1 = -155(25)$ ,  $c_2 = 2.26(84)$  and  $c_3 = -0.011(7)$  (ref. 63)



**Supplementary Table 4 Results of multi-stage core formation modeling**

| Model #       | Core mass fraction | Earth silicate |           |           |                         | Earth core |           |          |          | Difference from target values* |
|---------------|--------------------|----------------|-----------|-----------|-------------------------|------------|-----------|----------|----------|--------------------------------|
|               |                    | FeO<br>wt%     | Ni<br>ppm | Co<br>ppm | H <sub>2</sub> O<br>ppm | O<br>wt%   | Si<br>wt% | S<br>wt% | H<br>wt% |                                |
| S1            | 0.311              | 7.96           | 1989      | 102.9     | 687                     | 2.89       | 6.53      | 2.15     | 0.56     | 0.0025                         |
| S1'†          | 0.318              | 7.54           | 1887      | 97.5      | 659                     | 2.72       | 7.56      | 2.11     | 0.34     | 0.0086                         |
| S2            | 0.284              | 8.05           | 2018      | 109.7     | 702                     | 1.64       | 1.91      | 2.03     | 0.33     | 0.0226                         |
| S3            | 0.288              | 7.84           | 2177      | 112.9     | 685                     | 1.69       | 2.37      | 2.11     | 0.32     | 0.0380                         |
| F1            | 0.332              | 8.44           | 1627      | 87.8      | 707                     | 2.02       | 11.40     | 2.15     | 0.34     | 0.0506                         |
| F2            | 0.303              | 7.73           | 2066      | 96.5      | 715                     | 0.97       | 5.87      | 2.14     | 0.33     | 0.0124                         |
| F3-1          | 0.295              | 7.98           | 1947      | 95.0      | 698                     | 0.91       | 4.53      | 2.19     | 0.32     | 0.0134                         |
| F3-2          | 0.300              | 7.94           | 2097      | 99.7      | 693                     | 0.80       | 5.51      | 2.16     | 0.33     | 0.0119                         |
| R1            | 0.345              | 8.10           | 1852      | 161.8     | 678                     | 1.95       | 13.15     | 2.14     | 0.27     | 0.3507                         |
| R2            | 0.281              | 7.90           | 1708      | 129.1     | 709                     | 0.62       | 1.41      | 2.03     | 0.28     | 0.1063                         |
| R3            | 0.281              | 7.83           | 2050      | 143.5     | 715                     | 0.63       | 1.44      | 2.05     | 0.29     | 0.1872                         |
| HOM-1‡        | 0.275              | 8.07           | 1579      | 129.0     | -                       | 1.19       | 1.01      | 2.00     | 0.00     | 0.1315                         |
| HOM-2‡        | 0.331              | 6.37           | 3581      | 202.0     | -                       | 2.24       | 9.91      | 2.00     | 0.00     | 1.6911                         |
| Present Earth | 0.325              | 8.05           | 1960      | 105       | >690                    |            |           |          |          |                                |

Present-day Earth composition is from refs. 18 and 59.

\*Defined as  $\Sigma((\text{calculated value})/(\text{present Earth value})-1)^2$  for core mass fraction and mantle concentrations of FeO, Ni and Co.

†with  $K_D$  given in Eq. 10

‡Homogeneous accretion models by ref. 60

**Supplementary Table 5 Chemical compositions (wt%) of stating material and silicate melt**

|                                | SM*   | run #1     | run #2     | run #3    | run #4    | run #5     | run #6     |
|--------------------------------|-------|------------|------------|-----------|-----------|------------|------------|
| N†                             | 28    | 8          | 8          | 8         | 8         | 8          | 8          |
| SiO <sub>2</sub>               | 49.64 | 36.14(123) | 38.54(126) | 32.67(65) | 37.59(99) | 34.26(98)  | 40.17(57)  |
| TiO <sub>2</sub>               | 1.64  | 1.73(14)   | 1.89(9)    | 3.08(14)  | 1.73(7)   | 1.96(16)   | 2.49(12)   |
| Al <sub>2</sub> O <sub>3</sub> | 14.88 | 14.78(81)  | 13.96(43)  | 19.34(77) | 18.71(48) | 18.63(103) | 11.32(80)  |
| FeO                            | 11.43 | 29.43(193) | 26.10(175) | 24.47(79) | 22.89(89) | 21.01(42)  | 23.27(136) |
| MgO                            | 8.51  | 9.33(35)   | 9.31(16)   | 11.03(29) | 11.34(23) | 11.82(81)  | 8.91(57)   |
| CaO                            | 10.55 | 4.15(46)   | 4.60(13)   | 4.53(40)  | 4.06(22)  | 5.02(72)   | 8.40(57)   |
| Na <sub>2</sub> O              | 2.90  | 3.24(22)   | 2.82(19)   | 3.68(20)  | 2.35(39)  | 3.66(40)   | 3.80(23)   |
| K <sub>2</sub> O               | 0.12  | 0.25(1)    | 0.25(4)    | 0.32(3)   | 0.26(4)   | 0.43(6)    | 0.32(3)    |
| Total                          | 99.67 | 99.05(120) | 97.48(100) | 99.11(96) | 99.28(79) | 96.80(263) | 98.67(74)  |

Numbers in parentheses are one standard deviation in the last digits.

\*~0.6 and ~1.0 wt% H<sub>2</sub>O was added.

†Number of analyses

**Supplementary Table 6 Chemical compositions (wt%) of quenched liquid metals**

|       | run #1    | run #2   | run #3    | run #4     | run #5     | run #6    |
|-------|-----------|----------|-----------|------------|------------|-----------|
| N*    | 8         | -        | 8         | 8          | 8          | 8         |
| Fe    | 85.00(83) | 85.6(11) | 85.03(54) | 83.55(84)  | 85.24(188) | 92.54(55) |
| Si    | 2.27(20)  | 3.2(3)   | 2.16(15)  | 4.73(64)   | 1.52(20)   | 0.52(10)  |
| O     | 12.14(50) | 11.2(10) | 11.33(42) | 8.70(58)   | 8.92(61)   | 4.48(40)  |
| Al    | 0.20(2)   | N.D. -   | 0.21(3)   | 0.31(1)    | 0.43(21)   | 0.01(1)   |
| Mg    | 0.08(3)   | N.D. -   | 0.09(1)   | 0.10(1)    | 0.22(18)   | 0.01(1)   |
| Total | 99.70(85) | 100.00   | 98.82(86) | 97.39(118) | 96.34(102) | 97.56(53) |
| C†    | 1.28(2)   | -        | 1.01(7)   | 3.49(10)   | 1.69(13)   | 1.93(2)   |

Obtained with EDS for run #2 and with EPMA for other runs

Numbers in parentheses are one standard deviation in the last digits.

\*Number of analyses

†Measured separately without carbon-coating
