# Supplementary material for: Experimental evidence for hydrogen incorporation into Earth’s core
Source: PubMed Central journal article supplement (PMC8113257; doi:10.1038/s41467-021-22035-0), 2021-05-11
Supplement: 41467_2021_22035_MOESM2_ESM.pdf [file 41467_2021_22035_MOESM2_ESM.pdf]

## **Description of Additional Supplementary Files**

File name: Supplementary Data 1:

Description: Evolution of P, T, fO<sub>2</sub> and the silicate (BSE) and core compositions in Model #S1
